# Supplementary material
Source: publisher figshare collection journal article supplement (https://frontiersin.figshare.com/ndownloader/files/13001690)
Supplement: Supplementary file [file 13001690]

## *Supplementary Material*

# **The diversity of mammalian hemoproteins and microbial heme scavengers is shaped by an arms race for iron piracy**

Alessandra Mozzi\*, Diego Forni, Mario Clerici, Rachele Cagliani, Manuela Sironi

\* Correspondence: Alessandra Mozzi: [alessandra.mozzi@bp.lnf.it](mailto:alessandra.mozzi@bp.lnf.it)

## **Supplementary Tables**

**Supplementary Table S7.** List of *Pseudomonas aeruginosa* strains

**Supplementary Table S7. List of *Pseudomonas aeruginosa* strains**

| Organism/Strain                           | Assembly        | Accession ID      |
|-------------------------------------------|-----------------|-------------------|
| <i>Pseudomonas aeruginosa</i> 12-4-4(59)  | GCA_001482325.1 | NZ_CP013696.1     |
| <i>Pseudomonas aeruginosa</i> 19BR        | GCA_000223945.2 | NZ_AFXJ01000001.1 |
| <i>Pseudomonas aeruginosa</i> 213BR       | GCA_000223965.2 | NZ_AFXK01000001.1 |
| <i>Pseudomonas aeruginosa</i> 39016       | GCA_000148745.1 | NZ_CM001020.1     |
| <i>Pseudomonas aeruginosa</i> 8380        | GCA_001548135.1 | NZ_AP014839.1     |
| <i>Pseudomonas aeruginosa</i> AES-1R      | GCA_000220025.3 | NZ_CP013680.1     |
| <i>Pseudomonas aeruginosa</i> ATCC 15692  | GCA_001729505.1 | NZ_CP017149.1     |
| <i>Pseudomonas aeruginosa</i> ATCC 27853  | GCA_001618925.1 | NZ_CP015117.1     |
| <i>Pseudomonas aeruginosa</i> B136-33     | GCA_000359505.1 | NC_020912.1       |
| <i>Pseudomonas aeruginosa</i> BAMCPA07-48 | GCA_001632245.1 | NZ_CP015377.1     |
| <i>Pseudomonas aeruginosa</i> C7447m      | GCA_000468935.1 | NC_022360.1       |
| <i>Pseudomonas aeruginosa</i> Carb01 63   | GCA_000981825.1 | NZ_CP011317.1     |
| <i>Pseudomonas aeruginosa</i> Cu1510      | GCA_001465155.1 | CP013144.1        |
| <i>Pseudomonas aeruginosa</i> DHS01       | GCA_000496455.2 | NZ_CP013993.1     |
| <i>Pseudomonas aeruginosa</i> DK2         | GCA_000271365.1 | NC_018080.1       |
| <i>Pseudomonas aeruginosa</i> DN1         | GCA_001722005.2 | NZ_CP017099.1     |
| <i>Pseudomonas aeruginosa</i> DSM 50071   | GCA_001045685.1 | NZ_CP012001.1     |
| <i>Pseudomonas aeruginosa</i> F22031      | GCA_000816985.1 | NZ_CP007399.1     |
| <i>Pseudomonas aeruginosa</i> F23197      | GCA_001516245.1 | NZ_CP008856.1     |
| <i>Pseudomonas aeruginosa</i> F30658      | GCA_001516265.1 | NZ_CP008857.1     |
| <i>Pseudomonas aeruginosa</i> F63912      | GCA_001594325.1 | NZ_CP008858.1     |
| <i>Pseudomonas aeruginosa</i> F9670       | GCA_001542835.1 | NZ_CP008873.1     |
| <i>Pseudomonas aeruginosa</i> F9676       | GCA_001077475.1 | NZ_CP012066.1     |
| <i>Pseudomonas aeruginosa</i> FA-HZ1      | GCA_001750705.1 | NZ_CP017353.1     |
| <i>Pseudomonas aeruginosa</i> FRD1        | GCA_000829885.1 | NZ_CP010555.1     |
| <i>Pseudomonas aeruginosa</i> H27930      | GCA_001516325.1 | NZ_CP008860.1     |
| <i>Pseudomonas aeruginosa</i> H47921      | GCA_001516345.1 | NZ_CP008861.1     |
| <i>Pseudomonas aeruginosa</i> H5708       | GCA_001516305.1 | NZ_CP008859.1     |
| <i>Pseudomonas aeruginosa</i> IOMTU 133   | GCA_001548335.1 | NZ_AP017302.1     |
| <i>Pseudomonas aeruginosa</i> LES400      | GCA_000583935.1 | NZ_CP006982.1     |
| <i>Pseudomonas aeruginosa</i> LES431      | GCA_000508765.1 | NC_023066.1       |
| <i>Pseudomonas aeruginosa</i> LESB58      | GCA_000026645.1 | NC_011770.1       |
| <i>Pseudomonas aeruginosa</i> LESB65      | GCA_000583955.1 | NZ_CP006983.1     |
| <i>Pseudomonas aeruginosa</i> LESlike1    | GCA_000583975.1 | NZ_CP006984.1     |
| <i>Pseudomonas aeruginosa</i> LESlike4    | GCA_000583995.1 | NZ_CP006985.1     |
| <i>Pseudomonas aeruginosa</i> LESlike5    | GCA_000583895.1 | NZ_CP006980.1     |
| <i>Pseudomonas aeruginosa</i> LESlike7    | GCA_000583915.1 | NZ_CP006981.1     |
| <i>Pseudomonas aeruginosa</i> M1608       | GCA_001516365.1 | NZ_CP008862.1     |
| <i>Pseudomonas aeruginosa</i> M18         | GCA_000226155.1 | NC_017548.1       |
| <i>Pseudomonas aeruginosa</i> M37351      | GCA_001516385.1 | NZ_CP008863.1     |
| <i>Pseudomonas aeruginosa</i> MTB-1       | GCA_000504045.1 | NC_023019.1       |
| <i>Pseudomonas aeruginosa</i> N17-1       | GCA_001606045.1 | NZ_CP014948.1     |
| <i>Pseudomonas aeruginosa</i> NCGM 1900   | GCA_000829275.1 | NZ_AP014622.1     |
| <i>Pseudomonas aeruginosa</i> NCGM 1984   | GCA_000829255.1 | NZ_AP014646.1     |
| <i>Pseudomonas aeruginosa</i> NCGM2.S1    | GCA_000284555.1 | NC_017549.1       |
| <i>Pseudomonas aeruginosa</i> NCGM257     | GCA_001547955.1 | NZ_AP014651.1     |
| <i>Pseudomonas aeruginosa</i> NCTC10332   | GCA_001457615.1 | NZ_LN831024.1     |
| <i>Pseudomonas aeruginosa</i> NHmuc       | GCA_001900265.1 | NZ_CP013479.1     |
| <i>Pseudomonas aeruginosa</i> PA_D1       | GCA_001721745.1 | NZ_CP012585.1     |
| <i>Pseudomonas aeruginosa</i> PA_D16      | GCA_001721805.1 | NZ_CP012581.1     |
| <i>Pseudomonas aeruginosa</i> PA_D2       | GCA_001721765.1 | NZ_CP012578.1     |
| <i>Pseudomonas aeruginosa</i> PA_D21      | GCA_001722045.1 | NZ_CP012582.1     |
| <i>Pseudomonas aeruginosa</i> PA_D22      | GCA_001721825.1 | NZ_CP012583.1     |

|                                                     |                 |                   |
|-----------------------------------------------------|-----------------|-------------------|
| <i>Pseudomonas aeruginosa</i> PA_D25                | GCA_001721845.1 | NZ_CP012584.1     |
| <i>Pseudomonas aeruginosa</i> PA_D9                 | GCA_001721785.1 | NZ_CP012580.1     |
| <i>Pseudomonas aeruginosa</i> PA1                   | GCA_000496605.2 | NC_022808.2       |
| <i>Pseudomonas aeruginosa</i> PA1088                | GCA_001792835.1 | NZ_CP015001.1     |
| <i>Pseudomonas aeruginosa</i> PA11803               | GCA_001792875.1 | NZ_CP015003.1     |
| <i>Pseudomonas aeruginosa</i> PA121617              | GCA_001679685.1 | NZ_CP016214.1     |
| <i>Pseudomonas aeruginosa</i> PA1R                  | GCA_000496645.1 | NC_022806.1       |
| <i>Pseudomonas aeruginosa</i> PA1RG                 | GCA_001293085.1 | NZ_CP012679.1     |
| <i>Pseudomonas aeruginosa</i> PA38182               | GCA_000531435.1 | HG530068.1        |
| <i>Pseudomonas aeruginosa</i> PA7                   | GCA_000017205.1 | NC_009656.1       |
| <i>Pseudomonas aeruginosa</i> PA7790                | GCA_001870265.1 | NZ_CP014999.1     |
| <i>Pseudomonas aeruginosa</i> PA8281                | GCA_001792855.1 | NZ_CP015002.1     |
| <i>Pseudomonas aeruginosa</i> PA96                  | GCA_000626655.2 | NZ_CP007224.1     |
| <i>Pseudomonas aeruginosa</i> PACS2                 | GCA_000168335.1 | NZ_AAQW01000001.1 |
| <i>Pseudomonas aeruginosa</i> PAER4_119             | GCA_001879525.1 | NZ_CP013113.1     |
| <i>Pseudomonas aeruginosa</i> PAO1                  | GCA_000006765.1 | NC_002516.2       |
| <i>Pseudomonas aeruginosa</i> PAO1_Orsay            | GCA_900070375.1 | NZ_LN871187.1     |
| <i>Pseudomonas aeruginosa</i> PAO1-VE13             | GCA_000484545.1 | NC_022594.1       |
| <i>Pseudomonas aeruginosa</i> PAO1-VE2              | GCA_000484495.1 | NC_022591.1       |
| <i>Pseudomonas aeruginosa</i> PAO1H2O               | GCA_000714515.1 | NZ_CP008749.1     |
| <i>Pseudomonas aeruginosa</i> PSE305                | GCA_000750905.1 | NZ_HG974234.1     |
| <i>Pseudomonas aeruginosa</i> RP73                  | GCA_000414035.1 | NC_021577.1       |
| <i>Pseudomonas aeruginosa</i> S04 90                | GCA_000988505.1 | NZ_CP011369.1     |
| <i>Pseudomonas aeruginosa</i> S86968                | GCA_001515845.1 | NZ_CP008865.1     |
| <i>Pseudomonas aeruginosa</i> SCV20265              | GCA_000510305.1 | NC_023149.1       |
| <i>Pseudomonas aeruginosa</i> SCVFeb                | GCA_001900195.1 | NZ_CP013477.1     |
| <i>Pseudomonas aeruginosa</i> SCVJan                | GCA_001900225.1 | NZ_CP013478.1     |
| <i>Pseudomonas aeruginosa</i> SJTD-1                | GCA_000271985.2 | NZ_CP015877.1     |
| <i>Pseudomonas aeruginosa</i> T38079                | GCA_001515915.1 | NZ_CP008866.1     |
| <i>Pseudomonas aeruginosa</i> T52373                | GCA_001516005.1 | NZ_CP008867.1     |
| <i>Pseudomonas aeruginosa</i> T63266                | GCA_001516105.1 | NZ_CP008868.1     |
| <i>Pseudomonas aeruginosa</i> UCBPP-PA14            | GCA_000014625.1 | NC_008463.1       |
| <i>Pseudomonas aeruginosa</i> USDA-ARS-USMARC-41639 | GCA_001518975.1 | NZ_CP013989.1     |
| <i>Pseudomonas aeruginosa</i> VA-134                | GCA_001447845.1 | NZ_CP013245.1     |
| <i>Pseudomonas aeruginosa</i> VRFP04                | GCA_000473745.3 | NZ_CP008739.1     |
| <i>Pseudomonas aeruginosa</i> W16407                | GCA_001516165.1 | NZ_CP008869.1     |
| <i>Pseudomonas aeruginosa</i> W36662                | GCA_001516185.1 | NZ_CP008870.1     |
| <i>Pseudomonas aeruginosa</i> W45909                | GCA_001516205.1 | NZ_CP008871.1     |
| <i>Pseudomonas aeruginosa</i> W60856                | GCA_001516225.1 | NZ_CP008864.1     |
| <i>Pseudomonas aeruginosa</i> X78812                | GCA_001542795.1 | NZ_CP008872.1     |
| <i>Pseudomonas aeruginosa</i> YL84                  | GCA_000524595.1 | NZ_CP007147.1     |

---
